# Supplementary material
Source: publisher figshare collection journal article supplement (https://acs.figshare.com/ndownloader/files/22437473)
Supplement: Supplementary file 1 [file 22437473]

## Sheet: Sheet1
	Tartaric Acid (g/L)	Malic Acid (g/L)	Gluconic acid (g/L)	Lactic acid (g/L)	Total Acidity (g/L)	pH	Potassium (mg/L)	Density (g/mL)	Hundred grain weight (g)
CK	5.5±0.01	8.9±0.02	1.6±0.01	1.9±0.06	8±0.01	3.15±0.005	603±4	1.05879±0.0001	124.83±0.62c
T1	4.8±0.06	8.3±0.02	1.6±0.01	2±0.04	6.9±0.01	3.26±0.004	616±24	1.06328±0.000106	136.17±2.05b
T2	4.9±0.03	7.3±0.03	1.7±0.01	2.1±0.02	6.5±0.01	3.28±0.002	489±12	1.05945±0.000088	158.5±3.34a
T3	5.1±0.02	8±0.02	1.6±0.01	2±0.02	7.1±0.01	3.25±0.005	615±13	1.05492±0.000036	122.17±2.95c
